# Supplementary material for: A three-dimensional flower-like NiCo-layered double hydroxide grown on nickel foam with an MXene coating for enhanced oxygen evolution reaction electrocatalysis
Source: Royal Society of Chemistry journal article supplement (doi:10.1039/d1ra01368h), 2021-01-01
Supplement: d1ra01368h1.pdf [file d1ra01368h1.pdf]

# A three-dimensional flower-like NiCo-layered double hydrox-ide grow on nickel foam with MXene coating for enhancing oxygen evolution reaction electrocatalysis

Xuemei Li <sup>a</sup>, Zilu Zhang <sup>a</sup>, Qiankun Xiang <sup>a</sup>, Rongrong Chen <sup>a</sup>, Di Wu <sup>a</sup>, Guangyao Li <sup>a</sup>, Linjiang Wang <sup>a,b,c,†</sup>

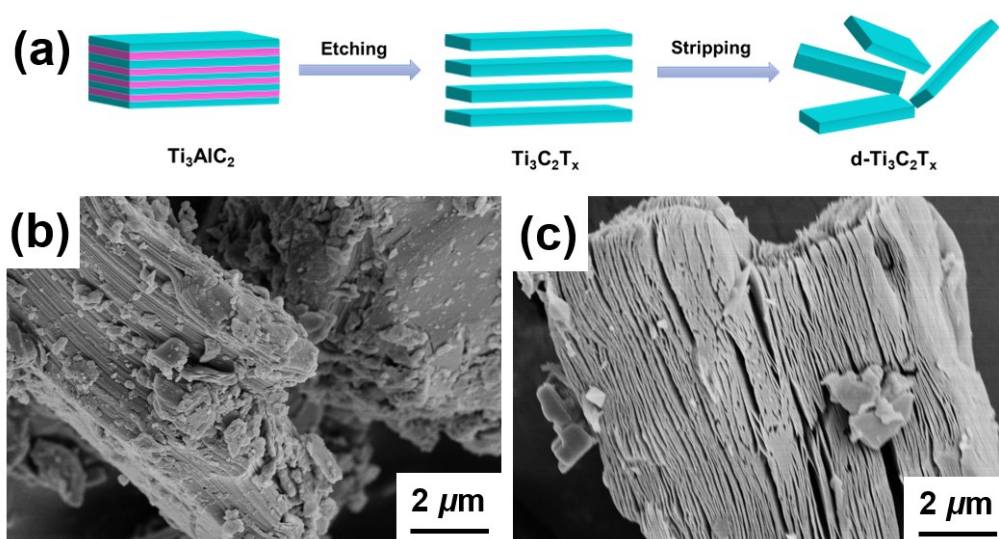

**Fig. S1** (a) The etching and exfoliation process  $\text{Ti}_3\text{AlC}_2$ , (b, c) SEM images of  $\text{Ti}_3\text{AlC}_2$  and  $\text{Ti}_3\text{C}_2\text{T}_x$ .

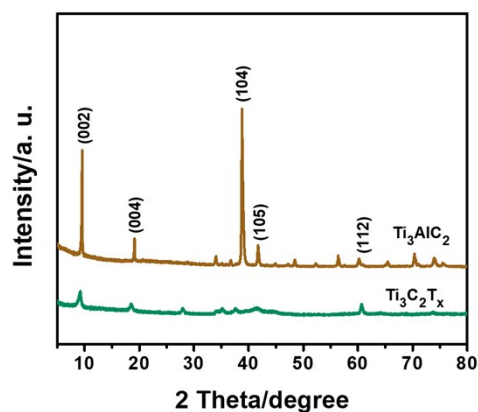

**Fig. S2** XRD patterns of  $\text{Ti}_3\text{AlC}_2$  and  $\text{Ti}_3\text{C}_2\text{T}_x$ .

<sup>a</sup> College of Materials Science and Engineering, Guilin University of Technology, Guilin 541004, China.

<sup>b</sup> Key Laboratory of New Processing Technology for Nonferrous Metal & Materials, Ministry of Education, Guilin University of Technology, Guilin 541004, China.

<sup>c</sup> Collaborative Innovation Center for Exploration of Nonferrous Metal Deposits and Efficient Utilization of Resources, Guilin University of Technology, Guilin 541004, China.

† Correspondence: wlinjiang@163.com.

Electronic Supplementary Information (ESI) available: [details of any supplementary information available should be included here]. See DOI: 10.1039/x0xx00000x

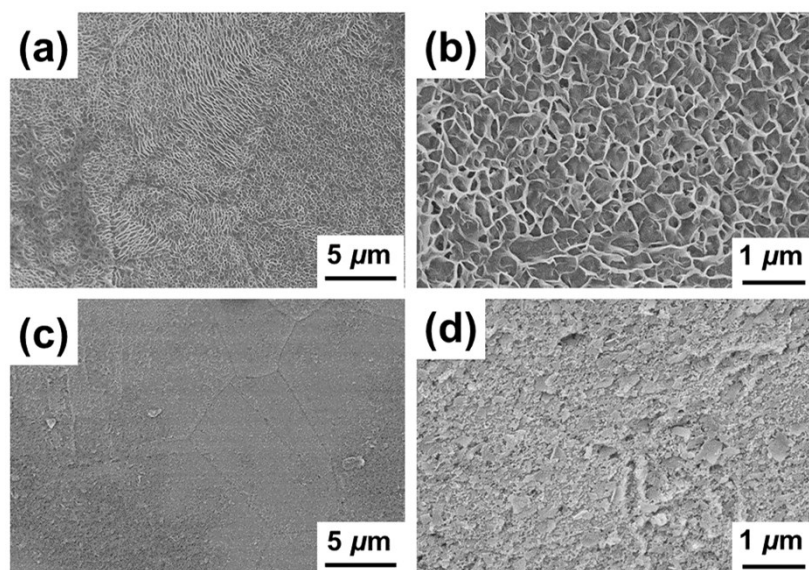

**Fig. S3** SEM images of (a, b) bare NF and (c, d)  $\text{Ti}_3\text{C}_2\text{T}_x/\text{NF}$ .

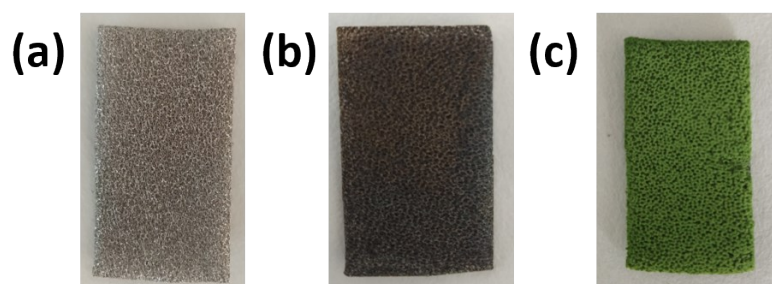

**Fig. S4** Photographs of (a) bare NF, (b)  $\text{Ti}_3\text{C}_2\text{T}_x/\text{NF}$ , and (c)  $\text{NiCo-LDH}/\text{Ti}_3\text{C}_2\text{T}_x/\text{NF}$ , respectively.

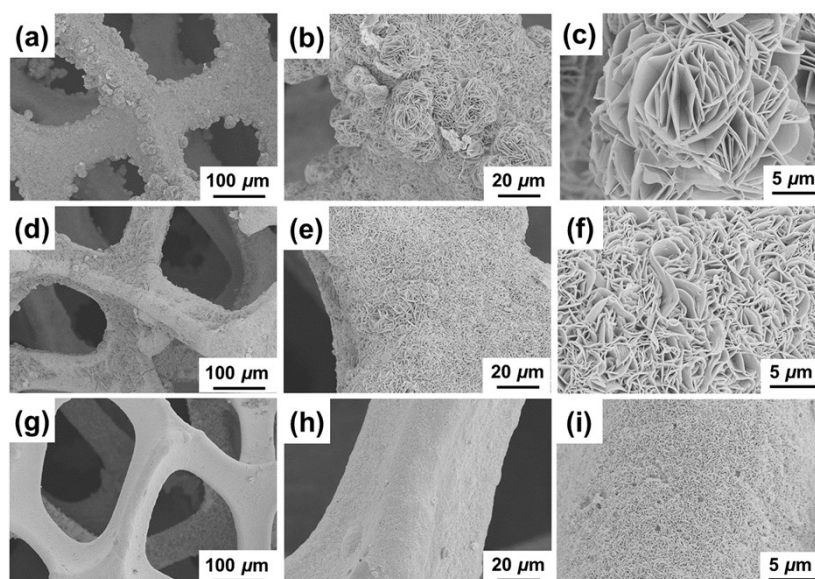

**Fig. S5** SEM images of  $\text{NiCo-LDH}/\text{Ti}_3\text{C}_2\text{T}_x/\text{NF}$  with different molar amount of Ni and Co nitrate precursors: (a-c) 4.0 mmol, (d-f) 2.4 mmol, (g-i) 0.8 mmol, respectively.

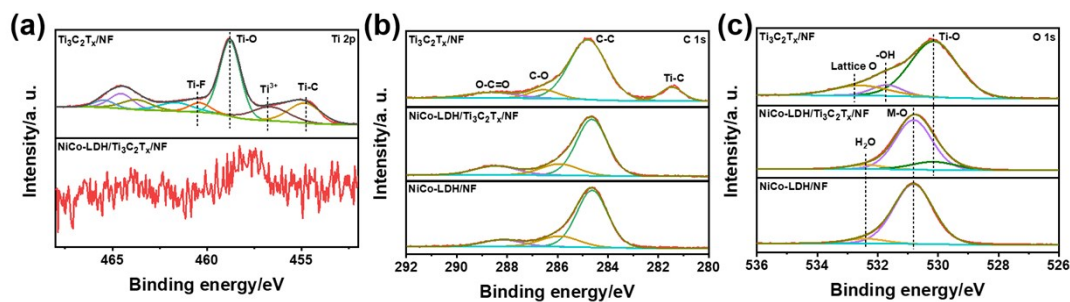

**Fig. S6** (a) Ti 2p XPS spectra of  $\text{Ti}_3\text{C}_2\text{T}_x/\text{NF}$  and  $\text{NiCo-LDH}/\text{Ti}_3\text{C}_2\text{T}_x/\text{NF}$ , (b, c) C 1s, and O 1s XPS spectra of  $\text{Ti}_3\text{C}_2\text{T}_x/\text{NF}$ ,  $\text{NiCo-LDH}/\text{Ti}_3\text{C}_2\text{T}_x/\text{NF}$  and  $\text{NiCo-LDH}$ , respectively.

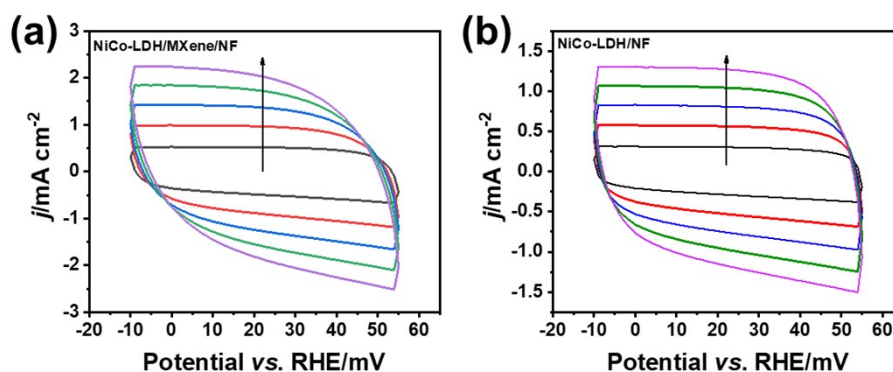

**Fig. S7.** (a, b) Cyclic voltammograms in the double layer region of the  $\text{NiCo-LDH}/\text{Ti}_3\text{C}_2\text{T}_x/\text{NF}$  and  $\text{Ti}_3\text{C}_2\text{T}_x/\text{NF}$  at different scan rates (2, 4, 6, 8, and  $10 \text{ mV s}^{-1}$ , respectively).

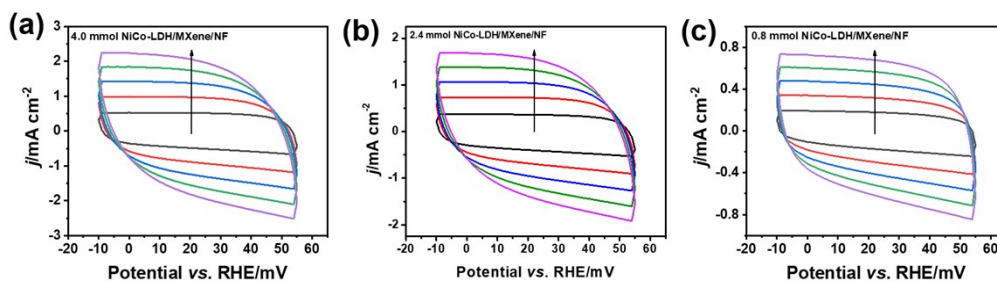

**Fig. S8** (a, b, c) Cyclic voltammograms in the double layer region of the  $\text{NiCo-LDH}/\text{Ti}_3\text{C}_2\text{T}_x/\text{NF}$  with different molar amount of Ni and Co nitrate precursors at different scan rates (2, 4, 6, 8, and  $10 \text{ mV s}^{-1}$ , respectively).
